# Supplementary material
Source: ML conference proceedings conference paper supplement (https://openreview.net/forum?id=gpgMRWgv9Q)
Supplement: supplementary_material [file attachment]

**Generating premises:**

Generate 20 more clauses. There must be a subject and an indirect object in each, and only 1 verb. The sentence must end with a conjunction and no dependent clause. Remove the dependent clause and truncate the generated clauses at the conjunction. All clauses must be in the context of a [domain]. List of conjunctions: and, but, yet, because. There must be an indirect object, which means both subject and object must be human, and use the same gendered pronoun.

Example:

[2 domain examples]

**Generating WSC data:**

The given sentence has two noun phrases. Generate two clauses that could reasonably end this sentence. Each clause must contain a pronoun that refers to a different noun phrase from the sentence.

Input: The city councilmen refused the demonstrators a permit because

Output:

Clause 1: they feared violence would occur

Clause 2: they advocated violence to achieve their goals

Explanation: The pronoun in clause 1 refers to the city councilmen. The pronoun in clause 2 refers to the demonstrators. Thus, both generated clauses refer to different noun phrases present in the sentence.

Input: The professor graded his students harshly because

Output:


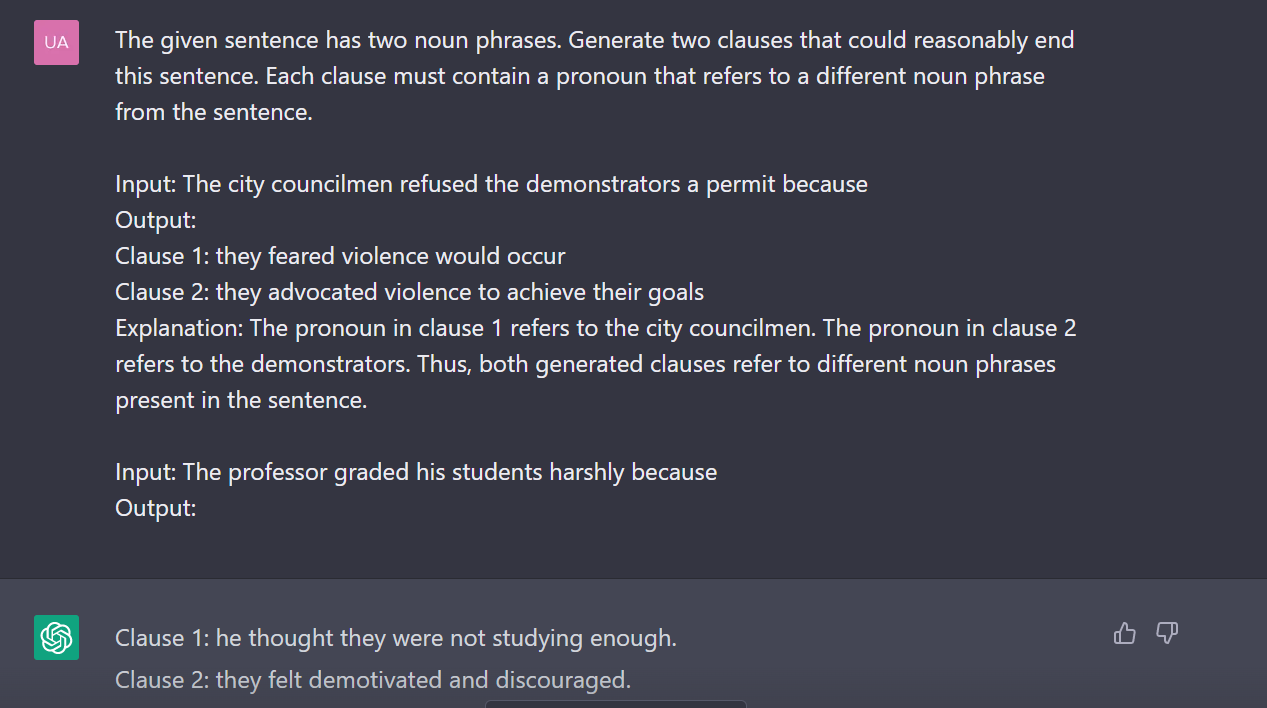


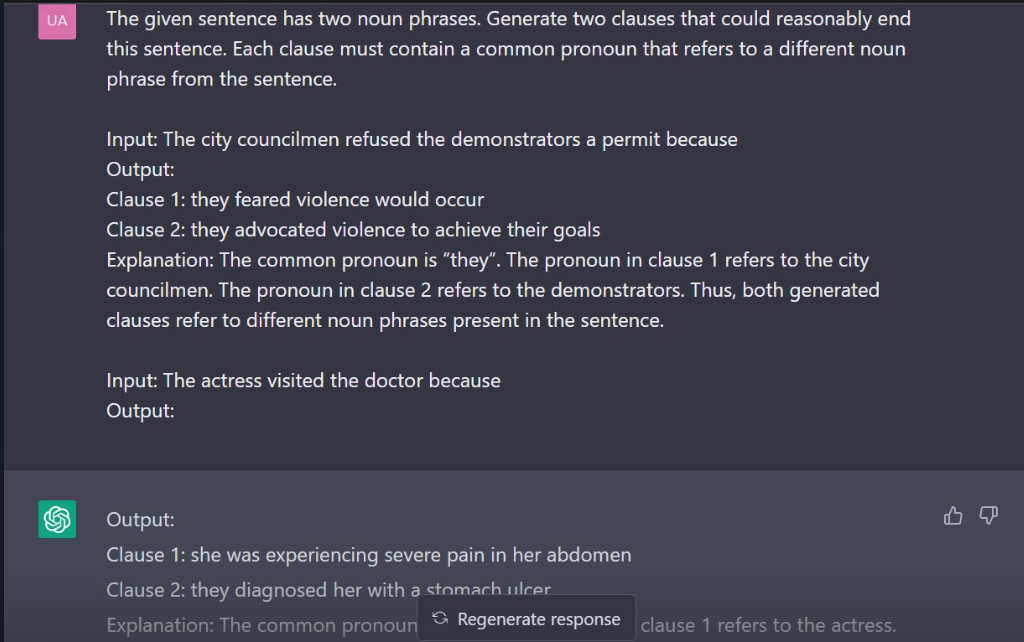


The given sentence has two noun phrases. Generate two clauses that could reasonably end this sentence. Each clause must contain a common pronoun that refers to a different noun phrase from the sentence. The noun phrases must not appear in the clauses.

Input: The city councilmen refused the demonstrators a permit because

Output:

Clause 1: they feared violence would occur

Clause 2: they advocated violence to achieve their goals

Explanation: The common pronoun is “they”. The pronoun in clause 1 refers to the city councilmen. The pronoun in clause 2 refers to the demonstrators. Thus, both generated clauses refer to different noun phrases present in the sentence.

Input: Amy hugged Bree as

Output:

[the following won’t work for all generated premises. Depends on sentence structure]

The given sentence has two noun phrases, one subject and one indirect object. Generate two clauses that could reasonably end this sentence. The noun phrases must not appear in the clauses. Pronouns must be used in place of the noun phrases. One generated clause should treat the subject of the input as the subject of the clause, while the other generated clause should treat the indirect object of the input as the subject of the clause.

Input: The city councilmen refused the demonstrators a permit because

Output:

Clause 1: they feared violence would occur

Clause 2: they advocated violence to achieve their goals

Explanation: The common pronoun is “they”. The pronoun in clause 1 refers to the city councilmen, the subject of the input. The pronoun in clause 2 refers to the demonstrators, the indirect object of the input. Thus, both generated clauses refer to different noun phrases present in the sentence.

Input: The judge acquitted the doctor since

Output:
