# Supplementary material
Source: ML conference proceedings conference paper supplement (https://openreview.net/forum?id=gpgMRWgv9Q)
Supplement: supplementary_material [file topiclist.xlsx]

## Sheet: Sheet1
News	Wikipedia	History and anthropology	Society, law, and justice	Elementary school science textbooks	9/11 reports	Fiction - literature or movie plots	art
"Rising Global Concerns over Climate Change: A Call to Action"	"History of the Roman Empire"	"The Fall of the Roman Empire: Causes and Consequences"	"The Evolution of Human Rights"	"The Amazing World of Plants: Photosynthesis and Growth"	"The 9/11 Commission Report: A Comprehensive Analysis"	"The Enigmatic Heir: A Tale of Intrigue and Family Secrets"	"The Evolution of Abstract Expressionism: From Pollock to Rothko"
"Breakthrough in Cancer Research: Promising New Treatment Discovered"	"Biography of Albert Einstein"	"Ancient Civilizations: Mesopotamia, Egypt, and Indus Valley"	"Gender Equality and Women's Empowerment"	"Discovering Our Solar System: Planets and Space Exploration"	"Intelligence Failures and the 9/11 Attacks"	"The Lost City of Avalon: Uncovering the Mythical Realm"	"Exploring the Beauty of Impressionist Landscapes"
"Government Implements New Policies to Tackle Income Inequality"	"Overview of World War II"	"The Age of Exploration: Discovering the New World"	"Police Reform and Community Relations"	"The Wonders of Weather: Climate and Natural Disasters"	"The Terrorist Plot: Planning and Execution of 9/11"	"The Shadow's Embrace: A Thrilling Noir Mystery"	"The Renaissance Masters: Artistic Brilliance in a Golden Age"
"Major Cybersecurity Breach Shakes Tech Industry"	"Exploration of the Solar System"	"The Renaissance: Rebirth of Art, Science, and Culture"	"Cybersecurity and Online Privacy"	"Animals and Their Habitats: Adaptations and Ecosystems"	"Airline Security and Hijackings on September 11th"	"The Time Traveler's Dilemma: A Journey through Past and Future"	"Surrealism: Unleashing the Power of the Unconscious Mind"
"Renewable Energy Sources Surpass Fossil Fuels in Power Generation"	"Introduction to Artificial Intelligence"	"The Industrial Revolution: Transforming Societies and Economies"	"Juvenile Justice System: Rehabilitation vs. Punishment"	"Exploring Matter: Properties and Changes"	"The Collapse of the World Trade Center Towers"	"The Forgotten Kingdom: Rediscovering a Hidden Legacy"	"The Influence of Pop Art on Modern Culture"
"Global Efforts to Combat COVID-19 Variants: Vaccines and Strategies"	"Evolutionary Biology: The Theory of Natural Selection"	"The French Revolution: Rise and Fall of the Monarchy"	"Social Media and its Impact on Society"	"Energy in Action: Forces and Motion"	"The Pentagon Attack: Assessing the Impact"	"Whispers in the Wind: A Haunting Love Story"	"Capturing Light and Shadow: The Art of Chiaroscuro"
"Investigation Reveals Widespread Corruption in Political Circles"	"Overview of the Renaissance Period"	"The American Revolution: Independence and the Birth of a Nation"	"Racial and Ethnic Discrimination: Challenges and Solutions"	"The Human Body: Anatomy and Health"	"Flight 93: Heroism and the Shanksville Crash"	"The Art of Deception: Unraveling a Complex Conspiracy"	"Art Nouveau: The Elegance of Nature-inspired Design"
"Space Exploration Milestone: First Manned Mission to Mars Planned"	"Biography of Marie Curie"	"The World Wars: Global Conflicts and their Impact"	"Gun Control: Balancing Rights and Safety"	"Exploring Earth's Landforms: Mountains, Rivers, and Oceans"	"The Role of Al-Qaeda in the 9/11 Attacks"	"The Secret Garden of Dreams: A Magical Adventure"	"The Power of Street Art: From Graffiti to Urban Beautification"
"Education Reforms Aimed at Enhancing STEM Learning"	"Introduction to Quantum Mechanics"	"The Cold War: Ideological Struggle and Nuclear Arms Race"	"Criminal Justice Reform: Addressing Mass Incarceration"	"The Marvels of Magnets: Magnetism and Electricity"	"Emergency Response and Rescue Efforts on 9/11"	"The Curious Case of Mr. Lockwood: A Detective's Pursuit"	"Discovering the World of Installation Art"
"Rapid Technological Advancements Transforming Industries"	"History of the United States"	"The Civil Rights Movement: Fight for Equality and Social Justice"	"Mental Health Awareness and Access to Treatment"	"Investigating Light and Sound: Waves and Energy"	"The Aftermath of 9/11: National Security and Policy Changes"	"Beyond the Veil: Exploring the Realm of Spirits"	"The Symbolism Movement: Artistic Language of the Soul"
"Humanitarian Crisis in War-Torn Country Deepens"	"Overview of Ancient Egypt"	"The Ottoman Empire: Rise, Expansion, and Decline"	"Immigration Policy and Border Control"	"The Water Cycle: Precipitation and Conservation"	"Intelligence Sharing and Cooperation Pre-9/11"	"The Masquerade Ball: Romance, Intrigue, and Hidden Identities"	"The Revolutionary Impact of Cubism on Modern Art"
"Sports World Mourns the Loss of Legendary Athlete"	"Biography of Leonardo da Vinci"	"The Age of Enlightenment: Intellectual and Cultural Movement"	"LGBTQ+ Rights and Equality"	"The World of Microorganisms: Bacteria and Viruses"	"Airport Screening Procedures and Lessons Learned"	"The Legend of Atlantis: Uncovering the Sunken City"	"Exploring the Aesthetics of Minimalism"
"New Study Unveils Alarming Increase in Mental Health Disorders"	"Introduction to the Theory of Relativity"	"The Mongol Empire: Conquests and Legacy"	"Climate Change and Environmental Justice"	"Discovering Rocks and Minerals: Earth's Geological Treasures"	"Counterterrorism Strategies and Their Effectiveness"	"The Forgotten Child: An Emotional Journey of Self-Discovery"	"The Beauty of Classical Sculpture: From Ancient Greece to Rome"
"High-Profile Legal Battle Sparks National Debate on Justice System"	"Overview of the French Revolution"	"The Ancient Greeks: Democracy, Philosophy, and Olympic Games"	"Hate Crimes and Extremism"	"The Secrets of Sound: Pitch, Volume, and Frequency"	"The Financial Trail: Tracking Funding for the 9/11 Attacks"	"The Ghost Writer's Enigma: A Literary Puzzle Unraveled"	"The Sublime in Landscape Painting: From Caspar David Friedrich to Turner"
"Emerging Markets Experience Economic Boom Amidst Global Challenges"	"Biography of Mahatma Gandhi"	"The Vikings: Explorations, Trade, and Raiding"	"Workplace Diversity and Inclusion"	"Life Cycles: From Seed to Plant, and Egg to Butterfly"	"The Role of Cybersecurity in Preventing Future Attacks"	"The Nightingale's Melody: Love and Sacrifice in World War II"	"The Intricate Art of Paper Cutting: Tradition and Innovation"
"Artificial Intelligence Revolutionizes Healthcare Industry"	"Introduction to Psychology"	"The Aztec Empire: Civilization of the Sun"	"Animal Rights and Welfare"	"The Science of Simple Machines: Levers, Pulleys, and Gears"	"Aviation Safety Enhancements Post-9/11"	"The Alchemist's Secret: Unlocking the Power of Transmutation"	"The Fascinating World of Digital Art and New Media"
"Investigation Exposes Environmental Hazards of Industrial Waste Disposal"	"Overview of the Industrial Revolution"	"The British Empire: Colonization and Imperialism"	"Drug Policy: Decriminalization and Harm Reduction"	"Exploring the Five Senses: Sight, Hearing, Smell, Taste, and Touch"	"The Impact of 9/11 on Immigration Policies"	"The Forbidden Forest: A Magical Quest for Truth"	"The Allure of Art Deco: Glamour and Geometry"
"Celebrity Scandal Rocks Entertainment Industry"	"Biography of Isaac Newton"	"The Spanish Conquistadors: Exploration and Conquest in the New World"	"Human Trafficking: Combating Modern-Day Slavery"	"The Diversity of Living Things: Classification and Adaptations"	"The 9/11 Hijackers: Profiles and Motivations"	"The Cursed Amulet: Ancient Magic and Modern Consequences"	"Portraiture Through the Ages: From Van Eyck to Warhol"
"Revolutionary Breakthrough in Renewable Battery Technology"	"Introduction to the Internet"	"The African Kingdoms: Great Empires of Mali, Ghana, and Songhai"	"Privacy Rights in the Digital Age"	"Exploring the Food Web: Producers, Consumers, and Decomposers"	"The Intelligence Community's Response to 9/11"	"The Lost Explorer: Adventures in Uncharted Lands"	"The Artistic Fusion of East and West: Japonism and Beyond"
"New Initiative Aims to Preserve Endangered Species and Biodiversity"	"Overview of Ancient Greece"	"The Egyptian Civilization: Pyramids, Pharaohs, and Hieroglyphs"	"Access to Education: Equity and Quality"	"The World of Energy: Renewable and Non-renewable Sources"	"Lessons from 9/11: Strengthening National Preparedness"	"The Art of Betrayal: Loyalties Tested in a Political Conspiracy"	"Exploring the Depths of Expressionism: Munch, Kirchner, and Kokoschka"
"Political Unrest Escalates in Unstable Region"	"Biography of Charles Darwin"	"The Mayan Civilization: Mysterious Ruins and Mathematical Achievements"	"Restorative Justice: Healing and Accountability"	"Our Changing Earth: Volcanoes, Earthquakes, and Plate Tectonics"	"The 9/11 Victims' Compensation Fund"	"The Crystal Key: Unlocking the Secrets of an Enchanted Realm"	"The Serenity of Zen Art: Capturing Tranquility"
"Scientists Discover Potential Cure for Alzheimer's Disease"	"History of the British Empire"	"The Samurai: Warriors of Feudal Japan"	"Income Inequality and Wealth Distribution"	"The Science of Sound: Vibrations and Pitch"	"The Role of Intelligence Agencies in Preventing Terrorist Attacks"	"The Siren's Song: Temptation and Redemption on the High Seas"	"The Art of Photography: From Documentary to Fine Art"
"Blockchain Technology Transforms Financial Sector"	"Overview of the Cold War"	"The Silk Road: Trade and Cultural Exchange between East and West"	"Disability Rights and Inclusion"	"The Science of Light: Reflection, Refraction, and Color"	"Air Traffic Control and Communication Breakdowns on 9/11"	"The Enchanted Mirror: Reflections of Love and Identity"	"Contemporary Ceramic Art: Tradition Transformed"
"Youth Activism Takes Center Stage in Climate Change Movement"	"Biography of Alexander the Great"	"The Native American Tribes: Indigenous Cultures and European Contact"	"Social Justice Movements: Past, Present, and Future"	"The World of Insects: Anatomy, Behavior, and Pollination"	"Airport Security Improvements Since 9/11"	"The Lunar Chronicles: A Futuristic Saga of Adventure and Romance"	"Exploring the Intersection of Art and Technology"
"Major Infrastructure Project Promises Economic Growth and Job Opportunities"	"Introduction to Genetics"	"The Crusades: Holy Wars and the Clash of Religions"	"Online Harassment and Cyberbullying"	"Exploring the Universe: Stars, Galaxies, and the Milky Way"	"Intelligence Analysis and the Failure to Connect the Dots"	"The Chosen One: A Hero's Journey to Save the World"	"The Intricate World of Islamic Art and Calligraphy"
"Growing Concerns Over Privacy in the Age of Big Data"	"Overview of the American Civil Rights Movement"	"The Ancient Chinese Dynasties: Qin, Han, Tang, and Ming"	"Alternative Dispute Resolution: Mediation and Arbitration"	"The Human Digestive System: Food and Nutrients"	"The 9/11 Commission: Findings and Recommendations"	"The Mystic's Legacy: Unveiling the Powers of the Ancients"	"The Power of Public Art: Transforming Communities"
"Natural Disaster Devastates Coastal Town: Rebuilding Efforts Begin"	"Biography of Nelson Mandela"	"The Russian Revolution: Fall of the Tsarist Regime and Rise of Communism"	"Housing Rights and Affordable Housing"	"Exploring Electricity: Circuits, Conductors, and Insulators"	"The Anthrax Attacks: A Post-9/11 Threat"	"The Haunting of Blackwood Manor: A Gothic Tale of Horror"	"The Legacy of Frida Kahlo: Art, Identity, and Resilience"
"Ongoing Conflict Sparks Humanitarian Crisis in African Nation"	"Introduction to Computer Science"	"The Prehistoric Era: Stone Age, Bronze Age, and Iron Age"	"Euthanasia and Assisted Suicide: Ethics and Legal Considerations"	"The World of Reptiles: Scales, Shells, and Survival"	"The Psychological Impact of 9/11 on Survivors and First Responders"	"The City of Whispers: A Dystopian Society Under Surveillance"	"The Magic of Surrealist Photography: Dreams in Reality"
"Breakthrough in Quantum Computing Opens New Possibilities"	"Overview of the Middle Ages"	"The Inca Empire: Engineering Marvels of the Andes"	"Workers' Rights and Labor Laws"	"The Power of Water: Dams, Currents, and Erosion"	"The Impact of 9/11 on Civil Liberties and Privacy Rights"	"The Secret Society: Hidden Agendas and Dark Rituals"	"Exploring the Ancient Art of Hieroglyphics and Pictograms"
"International Trade Dispute Threatens Global Economy"	"Biography of Galileo Galilei"	"The Byzantine Empire: Continuity of Roman Civilization in the East"	"Community Policing and Trust-Building"	"The Science of Forces: Pushes, Pulls, and Friction"	"The Role of International Cooperation in Counterterrorism"	"The Painting's Curse: A Supernatural Thriller"	"The Aesthetics of Op Art: Illusion and Perception"
"Social Media Giants Face Scrutiny Over Data Privacy Practices"	"History of Ancient Rome"	"The Black Death: Europe's Devastating Plague"	"Digital Divide: Access to Technology and Internet"	"The Life of Birds: Feathers, Flight, and Migration"	"The Intelligence Community's Reorganization After 9/11"	"The Chronicles of Evermore: A Fantasy Epic of Epic Proportions"	"The Beauty of Nature in Landscape Photography"
"Innovative Startup Revolutionizes Sustainable Packaging Solutions"	"Overview of World War I"	"The American Civil War: Divided Nation and Abolition of Slavery"	"Prison Reform: Rehabilitation and Reintegration"	"The World of Mammals: Fur, Teeth, and Adaptations"	"The 9/11 Legacy: Remembering and Honoring the Victims"	"The Witch's Apprentice: Magic, Mischief, and Coming of Age"	"The Artistic Revolution of the Harlem Renaissance"
"Prominent Political Figure Arrested on Corruption Charges"	"Biography of Wolfgang Amadeus Mozart"	"The Neolithic Revolution: Transition to Agriculture and Settled Life"	"Consumer Protection and Product Safety"	"The Science of Heat: Temperature, Conduction, and Insulation"	"The Role of Aviation Industry in Enhancing Security Measures"	"The Timeless Love Letter: A Romantic Journey Across Eras"	"The Elegance of Art Nouveau Jewelry and Design"
"New Study Sheds Light on Impact of Plastic Pollution on Marine Life"	"Introduction to Neuroscience"	"The Age of Imperialism: European Powers and Colonization"	"Child Protection and Welfare"	"The Science of Air: Atmosphere, Pressure, and Weather"	"The Effect of 9/11 on U.S. Foreign Policy and Military Interventions"	"The Shattered Crown: A Battle for Power in a Medieval Kingdom"	"Exploring the Abstract Realms of Wassily Kandinsky"
"Advancements in Genetic Engineering Pave the Way for Improved Crops"	"Overview of the Renaissance Art"	"The Ancient Romans: Republic, Empire, and Pax Romana"	"Domestic Violence and Intimate Partner Abuse"	"The Human Respiratory System: Breathing and Oxygen"	"The Significance of the 9/11 Memorials and Tribute Sites"	"The Oracle's Prophecy: Destiny and Sacrifice Collide"	"The Art of Origami: From Traditional to Contemporary"
"Global Education Gap Widens: Addressing the Learning Crisis"	"Biography of Jane Austen"	"The Enlightenment Thinkers: Voltaire, Rousseau, and Montesquieu"	"Freedom of Speech and Expression"	"The Science of Balance: Center of Gravity and Stability"	"The Global Impact of 9/11: Changing Dynamics of International Relations"	"The Forgotten Manuscript: Decoding a Cryptic Text"	"The Language of Color: Exploring Color Theory in Art"
"Tech Industry Faces Criticism for Lack of Diversity and Inclusion"	"Introduction to Astrophysics"	"The Indus Valley Civilization: Urban Planning and Harappan Culture"	"Ethics in Artificial Intelligence and Automation"	"The World of Fish: Fins, Scales, and Aquatic Habitats"	"The Psychological and Emotional Toll of 9/11 on the American Public"	"The Enchanted Forest: Friends and Foes in a Fairyland Adventure"	"The Captivating World of Conceptual Art"
"Government Implements Sweeping Reforms to Combat Climate Change"	"Overview of the Russian Revolution"	"The Fall of Constantinople: Ottoman Conquest and End of Byzantium"	"Genetic Privacy and Genetic Testing"	"The Science of Machines: Simple and Compound Machines"	"The Role of Emergency Management in Disaster Response on 9/11"	"The Phantom Thief: A Master of Disguise and Subterfuge"	"The Mysterious Beauty of Ancient Egyptian Art"
"Artificial Intelligence and Automation: Implications for the Future of Work"	"Biography of Vincent van Gogh"	"The Renaissance Women: Influential Figures and their Contributions"	"Economic Injustice: Poverty and Wealth Disparity"	"The Power of the Sun: Solar Energy and Solar Power"	"The Post-9/11 Surveillance State: Balancing Security and Civil Liberties"	"The Mechanical Menace: Steampunk Adventure in a Clockwork World"	"The Delicate Art of Chinese Brush Painting"
"Investigation Uncovers Illegal Wildlife Trafficking Network"	"Introduction to Economics"	"The Age of Discovery: Columbus, Magellan, and European Explorers"	"Humanitarian Crises and Refugee Rights"	"The Science of Reflection: Mirrors and Light Pathways"	"The Impact of 9/11 on Muslim Communities in the United States"	"The Isle of Illusions: A Mysterious Island with Hidden Dangers"	"The Artistic Exploration of Identity: Gender, Race, and Culture"
"Crisis in Healthcare System: Overburdened Hospitals and Staff Shortages"	"Overview of Ancient Mesopotamia"	"The Berlin Wall: Symbol of the Cold War and Division of Germany"	"Restitution and Reparations for Historical Injustices"	"The Science of States of Matter: Solids, Liquids, and Gases"	"The Role of Cybersecurity in Protecting Critical Infrastructure Post-9/11"	"The Forbidden Love: Star-Crossed Romance in a Divided Society"	"The Evolution of Fashion Illustration: From Vintage to Modern"
"Online Learning Revolutionizes Education in Remote Areas"	"Biography of Rosa Parks"	"The Inquisition: Religious Persecution and the Suppression of Heresy"	"Victims' Rights and Support Services"	"The World of Amphibians: Frogs, Toads, and Metamorphosis"	"The Lessons of 9/11: Enhancing Intelligence Sharing and Coordination"	"The Cryptic Code: Solving a Cryptographic Puzzle"	"The Bold Expressions of Street Photography"
"International Space Mission Discovers New Exoplanets"	"History of the Ottoman Empire"	"The Ancient Egyptians: Pharaohs, Pyramids, and Hieroglyphics"	"Policing Technology: Benefits and Concerns"	"The Science of Weather Patterns: Clouds, Wind, and Rain"	"The Economic Consequences of 9/11: Industries Affected and Recovery Efforts"	"The Quest for the Sacred Relic: A Heroic Adventure"	"The Intersection of Art and Science: The Beauty of Data Visualization"
"Crisis Hits Global Food Supply: The Impact of Climate Change"	"Overview of the Civil Rights Movement"	"The Ancient Persians: Achaemenid Empire and Cyrus the Great"	"Social Welfare Programs and Safety Nets"	"The Science of Floating and Sinking: Buoyancy and Density"	"The Intelligence-Gathering Techniques Employed Prior to 9/11"	"The Whispering Gallery: Secrets Echoed in the Halls of Power"	"The Artistic Inspiration of Nature: Landscapes, Flora, and Fauna"
"Controversial Legislation Sparks Protests and Civil Unrest"	"Biography of William Shakespeare"	"The Scientific Revolution: Galileo, Copernicus, and the Birth of Modern Science"	"Surveillance and Civil Liberties"	"The World of Birds: Beaks, Wings, and Nests"	"The Role of Media in Shaping the Narrative of 9/11"	"The Enigma of the Crystal Skull: Ancient Riddles Unveiled"	"The Craftsmanship of Artisanal Textiles: Weaving, Embroidery, and Printing"
"Advances in Robotics Transforming Industries and Daily Life"	"Introduction to Environmental Science"	"The Native American Resilience: Survival and Adaptation"	"Sexual Assault Awareness and Prevention"	"The Science of Shadows: Light and Blockage"	"The Impact of 9/11 on Airport Design and Architecture"	"The Timeless Watch: An Artifact with the Power to Control Time"	"Exploring the Art of Collage: From Dada to Contemporary"
"Sports Industry Embraces Sustainability: Green Initiatives in Stadiums"	"Overview of the Scientific Revolution"	"The Salem Witch Trials: Hysteria and Witchcraft Persecution"	"Economic Mobility and Social Mobility"	"The Science of Sound: Vibration and Frequency"	"The Rise of Radicalization and Extremism Post-9/11"	"The Oracle's Eye: Seeking Answers in a World of Deception"	"The Subversive Beauty of Punk Art"
"Social Media Influencers and the Rise of Digital Advertising"	"Biography of Amelia Earhart"	"The Cultural Revolution: Mao Zedong's Ideological Movement in China"	"Corporate Social Responsibility"	"The World of Plants: Parts, Growth, and Reproduction"	"The 9/11 Families' Advocacy for Justice and Accountability"	"The Heist of a Lifetime: Thieves, Treasures, and Twists"	"The Intricate World of Islamic Geometric Patterns"
"Investigation Uncovers Corruption in International Sports Organizations"	"Introduction to Philosophy"	"The French Resistance: Underground Movement in World War II"	"Criminalization of Drug Use: Policy and Impact"	"The Science of Magnetism: Attraction and Repulsion"	"The Role of Congressional Oversight in Preventing Future Attacks"	"The Mirror's Reflection: A Tale of Parallel Universes"	"The Art of Storytelling Through Comic Books and Graphic Novels"
"Emerging Technologies in Renewable Energy: Harnessing the Power of the Sun"	"Overview of Ancient China"	"The Roaring Twenties: Jazz Age, Flappers, and Prohibition"	"Digital Citizenship and Online Ethics"	"The Science of Electric Circuits: Conductors and Insulators"	"The Intelligence Community's Adaptation to Post-9/11 Threats"	"The Secret Codebreaker: Unmasking a Sinister Plot"	"Exploring the Power of Installation Art: Immersive and Interactive Experiences"
"Racial Injustice and Calls for Police Reform: The Fight for Equality"	"Biography of Martin Luther King Jr."	"The African Slave Trade: Transatlantic Slavery and Middle Passage"	"Environmental Sustainability and Conservation"	"The World of Invertebrates: Bugs, Worms, and Spiders"	"The Response of the United States Government to 9/11"	"The Hidden Garden: Uncovering the Truth Behind an Abandoned Oasis"	"The Enduring Legacy of Vincent van Gogh: From Starry Night to Sunflowers"
"Breakthrough in Gene Editing Raises Ethical Concerns"	"History of Ancient Greece"	"The Salem Witch Trials: Hysteria and Witchcraft Persecution"	"Elder Abuse and Senior Citizens' Rights"	"The Science of Energy: Forms and Transformations"	"The Evolution of Counterterrorism Strategies Since 9/11"	"The Last Enchanter: Battling Dark Forces in a Magical Realm"	"The Beauty of Still Life: Capturing Objects in Art"
"Online Retail Giants Dominate Market, Impacting Small Businesses"	"Overview of the Vietnam War"	"The Cultural Revolution: Mao Zedong's Ideological Movement in China"	"Refugee Crisis: Global Response and Responsibilities"	"The Science of Light: Reflection and Refraction"	"The Impact of 9/11 on International Travel and Tourism"	"The Lost Heirloom: A Family's Quest to Reclaim Their Legacy"	"The Evolution of Tattoo Art: From Ancient Traditions to Modern Ink"
"Global Water Crisis: Finding Solutions for Sustainable Access"	"Biography of Frida Kahlo"	"The French Resistance: Underground Movement in World War II"	"Racial Profiling and Bias in Law Enforcement"	"The World of Fossils: Paleontology and Extinct Creatures"	"The 9/11 Commission's Assessment of Intelligence Agencies"	"The Mythical Creatures Academy: A World of Magic and Friendship"	"The Artistic Innovations of Leonardo da Vinci: Science, Invention, and Creativity"
"New Study Reveals Impact of Air Pollution on Human Health"	"Introduction to Sociology"	"The Roaring Twenties: Jazz Age, Flappers, and Prohibition"	"Disaster Preparedness and Emergency Management"	"The Science of Earth's Layers: Crust, Mantle, and Core"	"The Role of Non-State Actors in Supporting the 9/11 Attacks"	"The Silent Symphony: A Musician's Journey of Self-Discovery"	"The Influence of African Art on Modern and Contemporary Artists"
"Government Initiatives Aim to Tackle Homelessness Epidemic"	"Overview of the Age of Enlightenment"	"The African Slave Trade: Transatlantic Slavery and Middle Passage"	"Consumerism and Overconsumption"	"The Science of Ecosystems: Interactions and Interdependence"	"The Intelligence Sharing Challenges and Solutions Post-9/11"	"The Ghost Ship: Haunted Waters and Supernatural Encounters"	"The Art of Mosaic: From Ancient Rome to Modern Masterpieces"
"Exploring the Potential of 5G Technology: The Future of Connectivity"	"Biography of Pablo Picasso"	"The Indian Independence Movement: Gandhi, Non-violence, and British Rule"	"Human Rights Violations in Conflict Zones"	"The World of Arachnids: Spiders, Scorpions, and Webs"	"The Legal and Ethical Implications of Counterterrorism Measures"	"The Timekeeper's Hourglass: A Race Against Time to Save the World"	"The Expressive World of Street Portraits: Capturing Humanity"
"International Efforts to Combat Human Trafficking Intensify"	"Introduction to Linguistics"	"The Space Race: Cold War Competition and the Moon Landing"	"Restorative Justice Practices in Schools"	"The Science of Motion: Speed, Velocity, and Acceleration"	"The Effect of 9/11 on Airport Infrastructure and Security Technology"	"The Enchanted Locket: Unlocking Memories and Unveiling Secrets"	"The Intriguing Beauty of Abstract Sculpture"
"Virtual Reality and Augmented Reality: Transforming Industries and Experiences"	"Overview of the Crusades"	"The Reformation: Martin Luther and the Protestant Movement"	"Labor Exploitation and Modern-Day Slavery"	"The Science of Sound: Volume and Pitch"	"The Role of Intelligence Analysis in Identifying Future Threats"	"The Midnight Circus: A Carnival of Shadows and Mystery"	"The Serene Aesthetics of Japanese Zen Gardens"
"Political Turmoil Threatens Stability in a Major World Power"	"Biography of Albert Camus"	"The Greek City-States: Athens, Sparta, and Democracy"	"Social Inequality: Causes and Consequences"	"The World of Mollusks: Snails, Clams, and Octopuses"	"The Financial Investigations into 9/11: Follow the Money"	"The Forgotten Realm: Rediscovering a Lost Civilization"	"The Art of Body Painting: Exploring Creativity on the Human Canvas"
"Renewed Focus on Mental Health in the Workplace"	"History of Ancient Egypt"	"The Cultural Revolution: Mao Zedong's Ideological Movement in China"	"Rights of Indigenous Peoples"	"The Science of Weather: Meteorology and Forecasting"	"The Influence of 9/11 on Public Opinion and Political Discourse"	"The Dreamcatcher's Promise: Protecting Dreams from Nightmares"	"The Evolution of Land Art: Nature as the Canvas"
"Disaster Resilience Strategies in the Face of Climate Change"	"Overview of the Space Race"	"The French Resistance: Underground Movement in World War II"	"Child Labor and Exploitation"	"The Science of Rocks: Minerals and Geological Processes"	"The Intelligence Community's Integration of Technology After 9/11"	"The Secret Society of Magicians: Conjuring Chaos and Illusions"	"The Impact of Social and Political Movements on Art"
"Breakthrough in Sustainable Transportation: Electric Vehicles on the Rise"	"Biography of Anne Frank"	"The Roaring Twenties: Jazz Age, Flappers, and Prohibition"	"Criminalization of Homelessness"	"The World of Crustaceans: Crabs, Lobsters, and Shrimp"	"The Impact of 9/11 on Emergency Response Protocols and Training"	"The Key to Wonderland: A Journey Through a World of Imagination"	"Exploring the Artistic Process: From Concept to Creation"
"Government Clashes with Tech Companies Over Data Encryption"	"Introduction to Anthropology"	"The African Slave Trade: Transatlantic Slavery and Middle Passage"	"Whistleblower Protection and Corporate Accountability"	"The Science of Gravity: Mass, Weight, and Force"	"The Role of Interagency Collaboration in Preventing Terrorist Attacks"	"The Celestial Guardians: Defenders of the Cosmic Balance"	"The Intricate Craftsmanship of Ceramics: Pottery, Porcelain, and Stoneware"
"Investigation Exposes Forced Labor Practices in Global Supply Chains"	"Overview of the Scientific Method"	"The Indian Independence Movement: Gandhi, Non-violence, and British Rule"	"Artificial Intelligence and Legal Ethics"	"The Science of Sound: Sound Waves and Vibrations"	"The 9/11 Commemorations: Healing and Remembering"	"The Mystic's Apprentice: Learning the Secrets of Magic"	"The Transformative Power of Performance Art"
"COVID-19 Vaccine Distribution Challenges: Equity and Access"	"Biography of Ernest Hemingway"	"The Space Race: Cold War Competition and the Moon Landing"	"Access to Healthcare: Equity and Affordable Care"	"The World of Birds: Flight, Feathers, and Nests"	"The Intelligence Community's Shift in Focus Post-9/11"	"The Curse of Blackthorn Manor: Unraveling a Dark Family Curse"	"The Fascinating World of Optical Illusions in Art"
"Renewable Energy Projects Drive Economic Growth in Developing Nations"	"Introduction to Political Science"	"The Reformation: Martin Luther and the Protestant Movement"	"Economic Justice and Fair Trade"	"The Science of Plants: Photosynthesis and Reproduction"	"The Use of Enhanced Interrogation Techniques in the Post-9/11 Era"	"The Starlit Symphony: Music, Magic, and a Mysterious Maestro"	"The Art of Indigenous Cultures: Celebrating Heritage and Identity"
"Global Efforts to Combat Opioid Crisis: Strategies and Solutions"	"Overview of the Byzantine Empire"	"The Greek City-States: Athens, Sparta, and Democracy"	"Cybercrime and Digital Forensics"	"The Science of Electricity: Circuits and Conductors"	"The Role of Aviation Security in Preventing Hijackings"	"The Forbidden Tome: Ancient Knowledge with Dangerous Consequences"	"The Intersection of Art and Music: Album Covers and Visual Expression"
"Ethical Dilemmas in Artificial Intelligence: Ensuring Accountability"	"Biography of Frida Kahlo"	"The Age of Absolutism: Louis XIV, Peter the Great, and Absolute Monarchy"	"Sentencing Disparities: Racial and Socioeconomic Factors"	"The World of Protozoa: Amoebas, Paramecia, and Protists"	"The Effect of 9/11 on Immigration Policies and Border Security"	"The Dreamweaver's Quest: Saving Reality from Nightmares"	"The Delicate Beauty of Glassblowing: From Venetian Tradition to Contemporary Art"
"Investigation Reveals Misconduct in Pharmaceutical Industry"	"History of Ancient Rome"	"The Silk Road: Trade and Cultural Exchange between East and West"	"International Humanitarian Law and Armed Conflicts"	"The Science of Forces: Push, Pull, and Friction"	"The Intelligence Community's Adaptation to Cyber Threats After 9/11"	"The Cursed Forest: Confronting Malevolent Forces in the Wilderness"	"The Abstract Universe of Jackson Pollock's Drip Paintings"
"Emerging Trends in Smart Home Technology"	"Overview of the Cuban Missile Crisis"	"The Native American Tribes: Indigenous Cultures and European Contact"	"Urbanization and Urban Planning"	"The Science of Light: Shadows and Reflections"	"The Legacy of 9/11: Lessons Learned and Ongoing Challenges"	"The Timeless Portrait: A Painting with the Power to Alter Fate"	"The Art of Collagraphy: Texture, Layers, and Printmaking"
"Political Instability Threatens Peace and Security in the Middle East"	"Biography of Virginia Woolf"	"The Crusades: Holy Wars and the Clash of Religions"	"Bullying Prevention and Intervention"	"The World of Gastropods: Snails, Slugs, and Shells"	"The International Response to 9/11: Coalition Building and Global Cooperation"	"The Secret Island: Hidden Treasures and Perilous Adventures"	"Exploring the Artistic Interpretations of Mythology and Folklore"
"New Study Highlights Impact of Climate Change on Indigenous Communities"	"Introduction to Cultural Studies"	"The Ancient Chinese Dynasties: Qin, Han, Tang, and Ming"	"Ethical Considerations in Biotechnology and Genetic Engineering"	"The Science of Weather: Climate and Atmosphere"	"The Role of Intelligence Agencies in Disrupting Terrorist Networks"	"The Whispering Woods: A Journey through Enchanted Realms"	"The Intricate Craftsmanship of Wood Carving: Tradition and Innovation"
"Revolutionary Breakthrough in Water Purification Technologies"	"Overview of the Inca Empire"	"The Russian Revolution: Fall of the Tsarist Regime and Rise of Communism"	"Corporate Influence on Politics and Democracy"	"The Science of Earthquakes: Seismic Activity and Fault Lines"	"The Impact of 9/11 on Public Safety and Emergency Management"	"The Book of Shadows: Unleashing the Power of Witchcraft"	"The Intersection of Art and Fashion: From Runways to Wearable Art"
"Controversial Immigration Policies and Humanitarian Crisis"	"Biography of Marie Antoinette"	"The Prehistoric Era: Stone Age, Bronze Age, and Iron Age"	"Sustainable Development and Social Responsibility"	"The World of Insects: Ants, Bees, and Beetles"	"The Intelligence-Gathering Tools and Techniques Employed Post-9/11"	"The Lost Explorer's Diary: Tales of Adventure and Discovery"	"The Expressive World of Calligraphy: From Traditional to Contemporary"
"Advancements in 3D Printing: Transforming Manufacturing Processes"	"Introduction to Philosophy of Mind"	"The Inca Empire: Engineering Marvels of the Andes"	"Criminal Justice System and Wrongful Convictions"	"The Science of Heat: Thermal Energy and Temperature"	"The Continuity of Government Plans and Homeland Security"	"The Crystal Rose: A Magical Flower with Healing Properties"	"The Ethereal Beauty of Light Art Installations"
"Global Food Waste Crisis: Addressing the Challenges of Hunger and Sustainability"	"Overview of the Harlem Renaissance"	"The Byzantine Empire: Continuity of Roman Civilization in the East"	"The Right to Privacy in the Era of Surveillance"	"The Science of Air: Wind, Pressure, and Gases"	"The Role of Intelligence Fusion Centers in Preventing Attacks"	"The Phantom's Curse: A Tale of Ghostly Revenge"	"The Artistic Exploration of Dreams and the Subconscious Mind"
"Renewable Energy Investments Surge Amidst Fossil Fuel Divestment"	"Biography of Claude Monet"	"The Black Death: Europe's Devastating Plague"	"Food Security and Hunger Relief"	"The World of Reptiles: Snakes, Lizards, and Turtles"	"The Effect of 9/11 on U.S. Immigration and Travel Policies"	"The Time Thief's Legacy: Protecting History from Temporal Anomalies"	"The Evolution of Portraiture: From Traditional to Conceptual"
"Online Privacy Concerns and the Role of Big Tech Companies"	"History of the Mayan Civilization"	"The American Civil War: Divided Nation and Abolition of Slavery"	"Police Militarization and Civil Liberties"	"The Science of Energy: Sources and Transformations"	"The Intelligence Community's Role in Countering Radicalization"	"The Forgotten Prophecy: Fulfilling a Destiny of Great Importance"	"The Art of Encaustic Painting: Wax, Texture, and Depth"
"Scientific Breakthrough in Fusion Energy: A Clean Energy Solution"	"Overview of the Great Depression"	"The Neolithic Revolution: Transition to Agriculture and Settled Life"	"Child Marriage and Forced Marriages"	"The Science of Reflection: Mirrors and Light"	"The 9/11 Attacks' Influence on U.S. Military Strategies"	"The Mystical Circus: Wonders and Mysteries Under the Big Top"	"The Captivating World of Macro Photography: Exploring the Details"
"COVID-19 Pandemic and Mental Health: Long-Term Impact and Solutions"	"Biography of Johann Sebastian Bach"	"The Age of Imperialism: European Powers and Colonization"	"Human Rights and Technology Companies"	"The World of Marsupials: Kangaroos, Koalas, and Wombats"	"The Impact of 9/11 on Intelligence Budgets and Resource Allocation"	"The Secret Doorway: A Portal to Another Dimension"	"The Intersection of Art and Architecture: Sculptures, Installations, and Structures"
"Investigation Uncovers Corruption in Global Banking System"	"Introduction to Gender Studies"	"The Ancient Romans: Republic, Empire, and Pax Romana"	"Workers' Rights in the Gig Economy"	"The Science of Electricity: Conductors and Insulators"	"The Interplay Between Intelligence Agencies and Law Enforcement Post-9/11"	"The Enchanted Necklace: A Jewel with Unimagined Powers"	"The Artistic Evolution of Frida Kahlo: From Self-Portraits to Surrealism"
"Education Technology and E-Learning: Transforming Learning Environments"	"Overview of the Aztec Empire"	"The Enlightenment Thinkers: Voltaire, Rousseau, and Montesquieu"	"Universal Basic Income: Pros and Cons"	"The World of Arthropods: Spiders, Scorpions, and Insects"	"The Role of Intelligence Analysis in Predicting Future Threats"	"The Witch Hunter's Pursuit: Tracking Down Dark Magic Practitioners"	"Exploring the Art of Storytelling Through Animation"
"Tensions Rise as Trade War Escalates Between Major Economies"	"Biography of Emily Dickinson"	"The Indus Valley Civilization: Urban Planning and Harappan Culture"	"Intersectionality: Understanding Multiple Forms of Discrimination"	"The Science of Forces: Motion, Gravity, and Friction"	"The Psychological Trauma of 9/11 on Witnesses and Survivors"	"The Forgotten City: Rediscovering a Lost Civilization"	"The Emotional Power of Expressionist Portraits"
"Emerging Trends in E-Sports and Online Gaming Industry"	"Introduction to Archaeology"	"The Fall of Constantinople: Ottoman Conquest and End of Byzantium"	"Cyberbullying Laws and Online Safety for Children"	"The World of Carnivorous Plants: Venus Flytraps and Pitcher Plants"	"The Intelligence Community's Engagement with Private Sector Partners"	"The Clockwork Inventor: An Ingenious Mind Creates Marvelous Machines"	"The Intricate Art of Henna: Tradition and Modern Adaptations"
"Urbanization Challenges: Sustainable Solutions for Growing Cities"	"Overview of the American Revolution"	"The Renaissance Women: Influential Figures and their Contributions"	"Gun Violence Prevention Strategies"	"The Science of Sound: Pitch and Volume"	"The Effect of 9/11 on National Identity and Patriotism"	"The Dreamcatcher Chronicles: Guardian of Dreams and Nightmares"	"The Artistic Legacy of Andy Warhol: Pop Culture and Iconography"
"Controversial Legislation Threatens LGBTQ+ Rights"	"Biography of Salvador Dalí"	"The Age of Discovery: Columbus, Magellan, and European Explorers"	"Political Corruption and Transparency"	"The World of Annelids: Earthworms, Leeches, and Segmented Worms"	"The Role of Intelligence Sharing in Preventing Terrorist Financing"	"The Alchemist's Apprentice: Unleashing the Power of Transmutation"	"The Beauty of Botanical Illustration: Capturing Nature's Diversity"
"Revolutionary Breakthrough in Battery Technology for Electric Vehicles"	"Introduction to Media Studies"	"The Berlin Wall: Symbol of the Cold War and Division of Germany"	"Social Media Influencers and Advertising Regulations"	"The Science of Weather: Clouds, Rain, and Snow"	"The Impact of 9/11 on Aviation Industry Regulations and Protocols"	"The Mirror of Souls: A Reflection of Inner Truths"	"The Art of Balancing Tradition and Innovation in Ceramic Sculpture"
"Exploring the Potential of Quantum Internet: Secure and Fast Connectivity"	"Overview of the Mongol Empire"	"The Inquisition: Religious Persecution and the Suppression of Heresy"	"Sentencing Reform: Reevaluating Mandatory Minimums"	"The World of Primates: Monkeys, Apes, and Humans"	"The Intelligence Community's Response to Technological Advancements"	"The Curse of the Moonstone: Breaking a Centuries-Old Spell"	"The Playful World of Pop Surrealism"
"Renewable Energy Projects Propel Job Creation and Economic Growth"	"Biography of Marcus Aurelius"	"The Ancient Egyptians: Pharaohs, Pyramids, and Hieroglyphics"	"Data Privacy and Protection in the Digital Era"	"The Science of Electricity: Circuits and Components"	"The 9/11 Attacks' Impact on Middle Eastern and Muslim Communities"	"The Elemental Guardians: Protecting the Balance of Nature"	"The Intersection of Art and Technology: Digital Sculpture and 3D Printing"
"Investigation Exposes Human Rights Violations in Conflict Zones"	"History of Ancient Persia"	"The Ancient Persians: Achaemenid Empire and Cyrus the Great"	"Sexual Harassment Policies and Workplace Culture"	"The World of Crustaceans: Crabs, Lobsters, and Shrimp"	"The Integration of Intelligence and Law Enforcement Agencies After 9/11"	"The Lost Diary: Unlocking Secrets of the Past"	"Exploring the Artistic Language of Graffiti: Street Art as a Form of Expression"
"Emerging Trends in Sustainable Fashion and Ethical Consumerism"	"Overview of the Korean War"	"The Scientific Revolution: Galileo, Copernicus, and the Birth of Modern Science"	"Cultural Appropriation and Respectful Exchange"	"The Science of Forces: Push, Pull, and Motion"	"The Effect of 9/11 on Civilian-Military Collaboration in National Security"	"The Circus of Illusions: Unveiling Tricks and Deceptions"	"The Harmonious Beauty of Chinese Brush Calligraphy"
"Crisis Hits Global Supply Chains: Impact on Trade and Economy"	"Biography of Leo Tolstoy"	"The Native American Resilience: Survival and Adaptation"	"Bioethics and Medical Research Ethics"	"The World of Snakes: Venomous and Non-venomous"	"The Intelligence Community's Approach to Countering Cyber Threats Post-9/11"	"The Forgotten Alchemy: Unearthing Ancient Potions and Elixirs"	"The Artistic Journey of Georgia O'Keeffe: Abstraction and Nature"
"Rapid Urbanization and Environmental Sustainability Challenges"	"Introduction to Criminology"	"The Salem Witch Trials: Hysteria and Witchcraft Persecution"	"Access to Justice for Marginalized Communities"	"The Science of Light: Colors and Optics"	"The Role of Intelligence Analysts in Identifying Terrorist Patterns"	"The Crystal Dragon: A Mythical Creature's Awakening"	"The Transformative Power of Public Murals: Art for Social Change"
"Breakthrough in Artificial Organ Transplants: Revolutionizing Healthcare"	"Overview of the Inquisition"	"The Cultural Revolution: Mao Zedong's Ideological Movement in China"	"Racial Segregation and Housing Discrimination"	"The World of Rodents: Mice, Rats, and Hamsters"	"The Socioeconomic Consequences of 9/11: Employment and Economic Stability"	"The Silent Library: Mysteries Hidden Among Dusty Shelves"	"The Art of Environmental Sculpture: Connecting Art and Nature"
"Government Initiatives to Address the Mental Health Crisis"	"Biography of Virginia Woolf"	"The French Resistance: Underground Movement in World War II"	"Economic Impacts of Climate Change"	"The Science of Weather: Climate, Temperature, and Wind"	"The Intelligence Community's Adaptation to Changing Terrorist Tactics"	"The Clockwork Heart: Love, Betrayal, and Mechanical Intrigue"	"The Evolution of Still Life Painting: From Dutch Masters to Contemporary Artists"
"Investigation Uncovers Corruption in International Aid Organizations"	"Introduction to Art History"	"The Roaring Twenties: Jazz Age, Flappers, and Prohibition"	"Human Rights and Counterterrorism Measures"	"The World of Aquatic Life: Fish, Dolphins, and Whales"	"The Impact of 9/11 on Privacy Rights and Surveillance Laws"	"The Enchanted Forest Chronicles: Adventures in a Magical Realm"	"The Emotional Expressions of Abstract Portraiture"
"Technological Advances in Renewable Energy Storage Solutions"	"Overview of the World Trade Organization"	"The African Slave Trade: Transatlantic Slavery and Middle Passage"	"Ethical Considerations in AI Facial Recognition Technology"	"The Science of Energy: Potential and Kinetic Energy"	"The Role of Intelligence Agencies in Preventing Future Mass Casualty Events"	"The Emerald Talisman: A Gem with Unimagined Powers"	"Exploring the World of Kinetic Art: Movement, Energy, and Perception"
"The Rise of Impact Investing: Aligning Profits with Social Good"	"Biography of Mahatma Gandhi"	"The Indian Independence Movement: Gandhi, Non-violence, and British Rule"	"Animal Testing: Ethics and Alternatives"	"The World of Birds: Feathers, Flight, and Migration"	"The Long-Term Psychological Effects of 9/11 on Survivors and Families"	"The Songbird's Lament: A Musician's Quest to Break a Curse"	"The Intersection of Art and Literature: Illustrating Stories and Poetry"
"New Study Reveals Link Between Air Pollution and Cognitive Decline"	"Introduction to Philosophy of Science"	"The Space Race: Cold War Competition and the Moon Landing"	"Criminalization of Poverty and Debtors' Prisons"	"The Science of Plants: Parts, Growth, and Pollination"	"The Intelligence Community's Role in Enhancing National Resilience"	"The Astral Traveler's Guide: Journeys Beyond the Physical Plane"	"The Artistic Fusion of Traditional Techniques and Digital Media"
					User
					Generate 100 unique topics or titles in the category Fiction - literature or movie plots
					ChatGPT
					"The Enigmatic Heir: A Tale of Intrigue and Family Secrets"
					"The Lost City of Avalon: Uncovering the Mythical Realm"
					"The Shadow's Embrace: A Thrilling Noir Mystery"
					"The Time Traveler's Dilemma: A Journey through Past and Future"
					"The Forgotten Kingdom: Rediscovering a Hidden Legacy"
					"Whispers in the Wind: A Haunting Love Story"
					"The Art of Deception: Unraveling a Complex Conspiracy"
					"The Secret Garden of Dreams: A Magical Adventure"
					"The Curious Case of Mr. Lockwood: A Detective's Pursuit"
					"Beyond the Veil: Exploring the Realm of Spirits"
					"The Masquerade Ball: Romance, Intrigue, and Hidden Identities"
					"The Legend of Atlantis: Uncovering the Sunken City"
					"The Forgotten Child: An Emotional Journey of Self-Discovery"
					"The Ghost Writer's Enigma: A Literary Puzzle Unraveled"
					"The Nightingale's Melody: Love and Sacrifice in World War II"
					"The Alchemist's Secret: Unlocking the Power of Transmutation"
					"The Forbidden Forest: A Magical Quest for Truth"
					"The Cursed Amulet: Ancient Magic and Modern Consequences"
					"The Lost Explorer: Adventures in Uncharted Lands"
					"The Art of Betrayal: Loyalties Tested in a Political Conspiracy"
					"The Crystal Key: Unlocking the Secrets of an Enchanted Realm"
					"The Siren's Song: Temptation and Redemption on the High Seas"
					"The Enchanted Mirror: Reflections of Love and Identity"
					"The Lunar Chronicles: A Futuristic Saga of Adventure and Romance"
					"The Chosen One: A Hero's Journey to Save the World"
					"The Mystic's Legacy: Unveiling the Powers of the Ancients"
					"The Haunting of Blackwood Manor: A Gothic Tale of Horror"
					"The City of Whispers: A Dystopian Society Under Surveillance"
					"The Secret Society: Hidden Agendas and Dark Rituals"
					"The Painting's Curse: A Supernatural Thriller"
					"The Chronicles of Evermore: A Fantasy Epic of Epic Proportions"
					"The Witch's Apprentice: Magic, Mischief, and Coming of Age"
					"The Timeless Love Letter: A Romantic Journey Across Eras"
					"The Shattered Crown: A Battle for Power in a Medieval Kingdom"
					"The Oracle's Prophecy: Destiny and Sacrifice Collide"
					"The Forgotten Manuscript: Decoding a Cryptic Text"
					"The Enchanted Forest: Friends and Foes in a Fairyland Adventure"
					"The Phantom Thief: A Master of Disguise and Subterfuge"
					"The Mechanical Menace: Steampunk Adventure in a Clockwork World"
					"The Isle of Illusions: A Mysterious Island with Hidden Dangers"
					"The Forbidden Love: Star-Crossed Romance in a Divided Society"
					"The Cryptic Code: Solving a Cryptographic Puzzle"
					"The Quest for the Sacred Relic: A Heroic Adventure"
					"The Whispering Gallery: Secrets Echoed in the Halls of Power"
					"The Enigma of the Crystal Skull: Ancient Riddles Unveiled"
					"The Timeless Watch: An Artifact with the Power to Control Time"
					"The Oracle's Eye: Seeking Answers in a World of Deception"
					"The Heist of a Lifetime: Thieves, Treasures, and Twists"
					"The Mirror's Reflection: A Tale of Parallel Universes"
					"The Secret Codebreaker: Unmasking a Sinister Plot"
					"The Hidden Garden: Uncovering the Truth Behind an Abandoned Oasis"
					"The Last Enchanter: Battling Dark Forces in a Magical Realm"
					"The Lost Heirloom: A Family's Quest to Reclaim Their Legacy"
					"The Mythical Creatures Academy: A World of Magic and Friendship"
					"The Silent Symphony: A Musician's Journey of Self-Discovery"
					"The Ghost Ship: Haunted Waters and Supernatural Encounters"
					"The Timekeeper's Hourglass: A Race Against Time to Save the World"
					"The Enchanted Locket: Unlocking Memories and Unveiling Secrets"
					"The Midnight Circus: A Carnival of Shadows and Mystery"
					"The Forgotten Realm: Rediscovering a Lost Civilization"
					"The Dreamcatcher's Promise: Protecting Dreams from Nightmares"
					"The Secret Society of Magicians: Conjuring Chaos and Illusions"
					"The Key to Wonderland: A Journey Through a World of Imagination"
					"The Celestial Guardians: Defenders of the Cosmic Balance"
					"The Mystic's Apprentice: Learning the Secrets of Magic"
					"The Curse of Blackthorn Manor: Unraveling a Dark Family Curse"
					"The Starlit Symphony: Music, Magic, and a Mysterious Maestro"
					"The Forbidden Tome: Ancient Knowledge with Dangerous Consequences"
					"The Dreamweaver's Quest: Saving Reality from Nightmares"
					"The Cursed Forest: Confronting Malevolent Forces in the Wilderness"
					"The Timeless Portrait: A Painting with the Power to Alter Fate"
					"The Secret Island: Hidden Treasures and Perilous Adventures"
					"The Whispering Woods: A Journey through Enchanted Realms"
					"The Book of Shadows: Unleashing the Power of Witchcraft"
					"The Lost Explorer's Diary: Tales of Adventure and Discovery"
					"The Crystal Rose: A Magical Flower with Healing Properties"
					"The Phantom's Curse: A Tale of Ghostly Revenge"
					"The Time Thief's Legacy: Protecting History from Temporal Anomalies"
					"The Forgotten Prophecy: Fulfilling a Destiny of Great Importance"
					"The Mystical Circus: Wonders and Mysteries Under the Big Top"
					"The Secret Doorway: A Portal to Another Dimension"
					"The Enchanted Necklace: A Jewel with Unimagined Powers"
					"The Witch Hunter's Pursuit: Tracking Down Dark Magic Practitioners"
					"The Forgotten City: Rediscovering a Lost Civilization"
					"The Clockwork Inventor: An Ingenious Mind Creates Marvelous Machines"
					"The Dreamcatcher Chronicles: Guardian of Dreams and Nightmares"
					"The Alchemist's Apprentice: Unleashing the Power of Transmutation"
					"The Mirror of Souls: A Reflection of Inner Truths"
					"The Curse of the Moonstone: Breaking a Centuries-Old Spell"
					"The Elemental Guardians: Protecting the Balance of Nature"
					"The Lost Diary: Unlocking Secrets of the Past"
					"The Circus of Illusions: Unveiling Tricks and Deceptions"
					"The Forgotten Alchemy: Unearthing Ancient Potions and Elixirs"
					"The Crystal Dragon: A Mythical Creature's Awakening"
					"The Silent Library: Mysteries Hidden Among Dusty Shelves"
					"The Clockwork Heart: Love, Betrayal, and Mechanical Intrigue"
					"The Enchanted Forest Chronicles: Adventures in a Magical Realm"
					"The Emerald Talisman: A Gem with Unimagined Powers"
					"The Songbird's Lament: A Musician's Quest to Break a Curse"
					"The Astral Traveler's Guide: Journeys Beyond the Physical Plane"
