# Supplementary material
Source: ML conference proceedings conference paper supplement (https://openreview.net/forum?id=gpgMRWgv9Q)
Supplement: supplementary_material [file wsc premise list.docx]

Generate 20 more clauses. There must be a subject and an indirect object in each, and only 1 verb. The sentence must end with a conjunction and no dependent clause. Remove the dependent clause and truncate the generated clauses at the conjunction. All clauses must be in the context of a [domain]. List of conjunctions: and, but, yet, because. There must be an indirect object, which means both subject and object must be human, and use the same gendered pronoun.

Example:

[2 domain examples]

Note: many sentences have overly similar structure

**Prompt to use for diverse sentence structure:**

**Generate 20 more clauses.**

**Rule 1: There must be a subject and an object in each clause.**

**Rule 2: All clauses must be in the context of an exam.**

**Rule 3: Both subject and object must use the same gendered pronoun.**

**Rule 4: If the subject is human, the object must be human. If the subject is inanimate, the object must be inanimate too.**

**Example:**

**As soon as the pen touched paper, (both pen and paper are inanimate)**

**When the invigilators passed by the students, (both invigilators and students are human)**

In case of error: follow up prompt:

Remember Rule 4, and regenerate clauses.

1. The calculator malfunctioned during the test, so (both subject and object are inanimate)
2. The proctor caught the cheater because (both subject and object are human)
3. The highlighter ran out of ink, so (both subject and object are inanimate)
4. The professor graded the assignments after class because (both subject and object are human)
5. The timer beeped before the student finished, so (both subject and object are inanimate)
6. The TA returned the graded exams to the students because (both subject and object are human)
7. The laptop battery died in the middle of the exam, so (both subject and object are inanimate)
8. The instructor praised the student's answer during the review session because (both subject and object are human)
9. The eraser smudged the writing on the paper, so (both subject and object are inanimate)
10. The teacher reminded the students of the exam date because (both subject and object are human)
11. The pencil tip broke when the student pressed too hard, so (both subject and object are inanimate)
12. The exam room was quiet except for the sound of scribbling, so (both subject and object are inanimate)
13. The toaster started smoking when she tried to toast a bagel, but...
14. When the pen ran out of ink, he threw it away, because...
15. The couch felt lumpy so she flipped the cushions, but...
16. He couldn't find his keys anywhere, so...
17. She accidentally spilled coffee on her shirt, and...
18. He felt a sharp pain in his foot when he stepped on a Lego, but...
19. She left her phone charger at home, so...
20. He found a stray cat in his backyard, and...
21. She ordered a salad, but the waiter brought her a steak, so...
22. He accidentally deleted an important file, and...
23. She tried to fix her leaky faucet, but...
24. He forgot his umbrella on a rainy day, so...
25. She bought a new plant, but it died after a week, because...
26. He lost his wallet on the train, and…
27. She spilled nail polish on her carpet, and...
28. He tripped on a crack in the sidewalk, but...
29. She received the wrong package in the mail, so...
30. He burned his hand while cooking dinner, but...
31. She accidentally locked herself out of her apartment, so...
32. He dropped his phone in the toilet, and...
33. The student sharpened their pencil during the test, so (both subject and object are human)
34. The clock on the wall ticked loudly, so (both subject and object are inanimate)
35. The proctor instructed the students to put away their phones because (both subject and object are human)
36. Taking the frying pan off the stove, (both frying pan and stove are inanimate)
37. If the dishwasher starts leaking, (both dishwasher and leaking are inanimate)
38. The cook forgot to add salt to the soup, which made her feel (soup and salt are inanimate)
39. When the blender stopped working, (both blender and working are inanimate)
40. The baker baked the cake without frosting, (both baker and cake are inanimate)
41. After the cutting board slipped from her hand, (both cutting board and hand are inanimate)
42. The sous chef taught the new cook how to use the knives, (both sous chef and new cook are human)
43. If the refrigerator door is left open, (both refrigerator and door are inanimate)
44. Cooking the steak too long made it taste (steak and cooking are inanimate)
45. When the oven timer rang, (both oven and timer are inanimate)
46. The pastry chef decorated the cupcakes with frosting, (both pastry chef and cupcakes are inanimate)
47. The sauté pan was too hot for the oil, which caused it to (sauté pan and oil are inanimate)
48. If the microwave malfunctions, (both microwave and malfunctions are inanimate)
49. The prep cook washed the vegetables before (both prep cook and vegetables are inanimate)
50. When the toaster popped, (both toaster and popped are inanimate)
51. The dishwasher loaded the plates into the machine, (both dishwasher and plates are inanimate)
52. The head chef criticized the line cook for undercooking the meat, (both head chef and line cook are human)
53. After the pot boiled over, (both pot and water are inanimate)
54. The kitchen manager ordered more supplies from the vendor, (both kitchen manager and vendor are human)
55. The answer sheet was misplaced, so (both subject and object are inanimate)
56. The student scratched out their incorrect answer, so (both subject and object are human)
57. The ruler helped the student draw straight lines, so (both subject and object are inanimate)
58. The teacher provided a study guide for the upcoming exam, so (both subject and object are human)
59. The balloons burst when they hit the ceiling. (both balloons and ceiling are inanimate)
60. The guests thanked the hosts for inviting them. (both guests and hosts are human)
61. The music annoyed the neighbors next door. (both music and neighbors are inanimate)
62. The caterer served the food on the table. (both caterer and table are inanimate)
63. The bartender poured her a drink. (both bartender and her are human)
64. The decorations brightened up the room. (both decorations and room are inanimate)
65. The hostess greeted her guests at the door. (both hostess and guests are human)
66. The punch spilled on the floor. (both punch and floor are inanimate)
67. The DJ played the wrong song, disappointing the crowd. (both DJ and crowd are human)
68. The candles on the cake burned out quickly. (both candles and cake are inanimate)
69. The photographer took their picture. (both photographer and their are human)
70. The balloons floated away into the sky. (both balloons and sky are inanimate)
71. The guests complimented the chef on the meal. (both guests and chef are human)
72. The cake was too dry for their taste. (both cake and their are inanimate)
73. The chandelier sparkled in the light. (both chandelier and light are inanimate)
74. The hosts introduced themselves to the new neighbors. (both hosts and neighbors are human)
75. The ice melted in the drinks. (both ice and drinks are inanimate)
76. The guests chatted with each other. (both guests and each other are human)
77. The streamers hung from the ceiling. (both streamers and ceiling are inanimate)
78. The host toasted to a successful party. (both host and party are inanimate)
79. Upon hearing the glass shatter, the burglar fled the scene, but (glass and burglar are inanimate)
80. The judge sentenced the thief to five years in prison after (both judge and thief are human)
81. The security guard noticed the broken lock and immediately called the police, but (lock and police are inanimate)
82. The suspect hid the stolen jewels in a secret location, but (jewels are inanimate)
83. The witness saw the perpetrator's face clearly and reported it to the authorities because (both witness and authorities are human)
84. The victim's laptop was stolen from the coffee shop, and (laptop and coffee shop are inanimate)
85. The detective found the missing evidence in an unexpected place because (both detective and evidence are inanimate)
86. The thief entered the store by breaking the window, but (thief and window are inanimate)
87. The prosecutor presented the evidence to the court, and (both prosecutor and court are human)
88. The security camera footage showed the thief leaving the building, but (thief and building are inanimate)
89. The suspect dropped a key while fleeing the scene, and (key is inanimate)
90. The police found fingerprints on the stolen items and identified the suspect because (both police and suspect are human)
91. The victim chased the thief but lost him in the crowd, and (both victim and thief are human)
92. The security guard apprehended the thief before he could leave the premises, but (thief is human)
93. The prosecutor cross-examined the witness, but (both prosecutor and witness are human)
94. The detective analyzed the crime scene for evidence, and (detective is human)
95. The victim reported the stolen car to the police, and (both victim and police are human)
96. The thief stole the valuable artwork from the museum, and (thief and artwork are inanimate)
97. The judge dismissed the case due to lack of evidence, but (judge is human)
98. The security guard prevented the thief from escaping the store, but (thief is human
99. The textbook was filled with helpful information, so (both subject and object are inanimate)
100. The student thanked the professor, but
101. The counselor gave the student advice, and
102. The coach praised the athlete, yet
103. The student asked the teacher a question, because
104. The parade participants waved to the spectators, and (both participants and spectators are human)
105. If the carnival ride breaks down, (both ride and carnival are inanimate)
106. The principal assigned the teacher a new class, but
107. The student gave the teacher a gift, and
108. The professor graded the student's paper, yet
109. The student shared their notes with the classmate, because
110. The teacher helped the student with their homework, but
111. The counselor scheduled the student's appointment, and
112. The coach gave the athlete a pep talk, because
113. The student returned the textbook to the librarian, but
114. The principal spoke to the parent, and
115. The teacher gave the student a detention, because
116. The student asked the teacher for help, but
117. The teacher reprimanded the student for cheating,
118. The librarian recommended the book to the patron,
119. The cow kicked the bucket, and
120. The tractor pulled the plow, and
121. The shepherd led the flock, and
122. The farmer sprayed the field, and
123. The scarecrow frightened the crow, and
124. The goat chewed the grass, and
125. The pig rolled in the mud, and
126. The bee buzzed around the hive, and
127. The horse neighed loudly, and
128. The rooster crowed at dawn, and
129. The sheep bleated softly, and
130. The chicken pecked the ground, and
131. The barn housed the animals, and
132. The hay bale sat in the field, and
133. The silo stored the grain, and
134. The water trough quenched the thirst, and
135. The fence enclosed the pasture, and
136. The sun set over the farm, and
137. The rainwater nourished the soil, and
138. The scarecrow's hat flew off in the wind, and
139. The principal announced the cancellation of the field trip,
140. The coach instructed the team on proper technique,
141. The janitor cleaned the mess left by the students,
142. The admissions officer denied the application due to incomplete documents,
143. The counselor advised the student on their college applications,
144. The security guard escorted the trespasser off the premises,
145. The parent criticized the teacher's grading methods,
146. The school nurse administered the flu shot to the student,
147. The custodian fixed the broken toilet in the bathroom,
148. The superintendent approved the school budget for the upcoming year,
149. The volunteer tutored the student in math after school,
150. The maintenance worker repaired the air conditioning in the classroom,
151. The guidance counselor reassured the anxious student before their test,
152. The assistant principal monitored the students during lunch,
153. The bus driver transported the students to and from school,
154. The music teacher conducted the orchestra in their performance,
155. The art teacher demonstrated the technique for the students.
156. The coach congratulated the team, and
157. The student handed in their assignment to the teacher, yet
158. The teacher explained the lesson to the student, because
159. The student thanked the substitute teacher, but
160. The counselor reassured the student, and
161. The security guard escorted the crowd-surfing fan, yet
162. The drummer dedicated the song to the singer, and
163. The roadie brought the guitarist a new pick, but
164. The manager denied the group's request, because
165. The lighting technician spotlighted the lead singer, and
166. The fan bought a t-shirt for the bassist, yet
167. The sound engineer adjusted the levels for the lead guitarist, but
168. The singer hugged the fans in the front row, and
169. The security team cleared a path for the band, because
170. The band thanked the opening act for the performance, yet
171. The stage crew set up the equipment for the next band, and
172. The fans cheered when the band came on stage, but
173. The guitar tech tuned the instruments for the show, because
174. The drummer taught the fan how to play the rhythm, and
175. The fan gave the singer a note of appreciation, but
176. The lead guitarist shredded the solo, yet
177. The bassist nodded at the drummer for the beat, and
178. The keyboardist played a catchy riff for the bridge, but
179. The drummer handed the drumsticks to the fan and
180. The lead singer kissed the guitarist but
181. The roadie passed the microphone to the backup singer yet
182. The sound engineer adjusted the volume for the band because
183. The lighting technician programmed the light show and
184. The fans sang along to the chorus but
185. The bassist waved at the crowd yet
186. The stage manager directed the crew because
187. The security guard escorted the rowdy concert-goer and
188. The photographer took a picture of the lead singer but
189. The concert-goer bought a drink for the guitarist yet
190. The tour bus driver drove the band to the venue because
191. The merchandiser counted the profits and
192. The backup singer danced with the frontman but
193. The security personnel searched the bags of the fans yet
194. The event organizer booked the opening act because
195. The music critic praised the band and
196. The pyrotechnics expert ignited the fireworks but
197. The roadie tuned the guitar for the lead singer yet
198. The soprano greeted the mezzo-soprano and
199. The tenor complimented the bass but
200. The conductor directed the orchestra yet
201. The baritone rehearsed with the tenor because
202. The mezzo-soprano practiced the duet and
203. The bass applauded the chorus but
204. The stage director instructed the cast yet
205. The wardrobe assistant adjusted the dress for the soprano because
206. The makeup artist applied the powder to the baritone and
207. The prop master handed the hat to the tenor yet
208. The sergeant commanded the private and
209. The captain inspired the soldiers yet
210. The soldier fired the cannon because
211. The lieutenant encouraged the troops and
212. The medic tended to the wounded but
213. The commander led the charge yet
214. The sniper eliminated the enemy scout because
215. The infantry protected the flank and
216. The scout reported to the captain yet
217. The general strategized with the colonel because
218. The fighter pilot destroyed the enemy's tank but
219. The cavalry charged at the enemy yet
220. The record producer signed the band yet
221. The music journalist interviewed the musicians because
222. The music teacher mentored the student and
223. The music therapist treated the patient but
224. The bellboy brought the guests their bags, and
225. The maid cleaned the guests' room, but
226. The waiter served the customers their food, yet
227. The bartender mixed the customer's drink because
228. The receptionist checked the guest into their room, and
229. The valet parked the customer's car, but
230. The housekeeper replaced the guests' towels yet
231. The doorman opened the door for the guests, because
232. The chef prepared the guest's meal, and
233. The security guard patrolled the hotel premises, but
234. The manager addressed the guest's complaint, yet
235. The accountant balanced the guest's account, because
236. The event planner coordinated the guest's conference, and
237. The houseman restocked the guests' toiletries, but
238. The maintenance worker repaired the guests' room yet
239. The concierge arranged the guests' transportation, because
240. The server brought the customers their drinks, and
241. The housekeeper made the guests' beds, but
242. The bellboy carried the guests' luggage, yet
243. The receptionist answered the guests' questions, because
244. The director cast the actor in the lead role and
245. The screenwriter handed the script to the producer but
246. The stunt double saved the actress from injury yet
247. The composer wrote the score for the film because
248. The makeup artist applied the prosthetics to the actor and
249. The cameraman adjusted the lighting for the scene but
250. The sound engineer adjusted the levels for the dialogue and
251. The editor cut the footage for the final version because
252. The costume designer created the wardrobe for the actors and
253. The assistant director gave the cues to the extras but
254. The set designer built the sets for the production yet
255. The choreographer rehearsed the dance sequence with the lead actress and
256. The publicist promoted the movie to the media because
257. The casting director chose the extras for the crowd scenes and
258. The location scout found the perfect filming locations but
259. The visual effects artist added the special effects to the shots and
260. The gaffer set up the lights for the night shoot because
261. The boom operator held the microphone for the actors and
262. The script supervisor ensured continuity in the shots yet
263. The director congratulated the actor on their performance, and
264. The producer offered the writer a deal, but
265. The casting agent called the actress for an audition, yet
266. The screenwriter pitched the idea to the studio head, because
267. The cinematographer showed the director the lighting setup, and
268. The editor gave the actor notes on their delivery, but
269. The sound engineer fixed the microphone for the actress, yet
270. The makeup artist applied foundation to the actor's face, and
271. The production designer showed the director the set design, but
272. The composer wrote the music for the film, because
273. The script supervisor gave the actor their lines, and
274. The stunt coordinator choreographed the fight scene for the actor, yet
275. The location manager scouted the perfect filming location for the director, and
276. The publicist promoted the film to the media, but
277. The grip handed the boom mic to the sound mixer, and
278. The wardrobe stylist picked out the actor's costume, yet
279. The still photographer captured images of the cast on set, because
280. The production assistant brought coffee to the director, and
281. The gaffer adjusted the lighting for the actress, but
282. The visual effects artist added CGI to the film, yet
283. The stunt double replaced the actor and
284. The director edited the scene and
285. The screenwriter revised the script but
286. The terrorist group claimed responsibility for the attack, stating that (both group and attack are inanimate).
287. The police informed the residents that (both police and residents are human).
288. The survivor recounted the events of the attack to the investigator, saying that (both survivor and investigator are human).
289. The news anchor reported the attack, announcing that (both anchor and attack are inanimate).
290. The witnesses described the suspects to the authorities, revealing that (both witnesses and authorities are human).
291. The actress forgot her lines and
292. The film crew set up the lighting and
293. The producer approved the budget yet
294. The editor cut the footage because
295. The sound designer added the music and
296. The special effects team created the explosions but
297. The cinematographer captured the scene and
298. The make-up artist applied the prosthetics and
299. The costume designer created the wardrobe but
300. The props department provided the weapons and
301. The set decorator arranged the furniture yet
302. The location manager scouted the area because
303. The audience cheered during the premiere and
304. The critics panned the movie but
305. The box office sales skyrocketed because
306. The awards ceremony recognized the film and
307. The canvas tore during the painting, so
308. The sculptor admired the statue because
309. The easel wobbled during the portrait, so
310. The art collector purchased the painting because
311. The paintbrush snapped in the artist's hand, so
312. The curator moved the exhibit to the main gallery because
313. The clay cracked in the kiln, so
314. The artist sketched the model because
315. The sculpture was too heavy for the stand, so
316. The photographer captured the subject because
317. The paint dried too quickly on the palette, so
318. The student of art learned the technique because
319. The charcoal smudged on the sketch, so
320. The artist used a ruler to measure the canvas because
321. The color of the paint was too bright for the composition, so
322. The brushstroke was too bold for the subject, so
323. The gallery owner hung the painting in the front room because
324. The artist mixed the paint with water because
325. The art critic wrote a review of the exhibit because
326. The sculpture was too fragile to transport, so
